# Supplementary material for: Dietary supplement use among undergraduate male students in health and non-health cluster colleges of a public-sector university in Dammam, Saudi Arabia
Source: PubMed Central journal article supplement (PMC6167804; doi:10.1186/s12906-018-2332-4), 2018-10-01

## استبيان | Questionnaire

تقييم استخدام المكملات الغذائية بين طلاب جامعة الإمام عبد الرحمن بن فيصل، المملكة العربية السعودية

Assessing dietary supplements use among undergraduate students of health and non-health colleges at Imam Abdulrahman Bin Faisal University, Saudi Arabia

Thank you for consenting to participate in the survey. We would like to know about the use of dietary supplements among undergraduate students. Please note that this questionnaire does not ask about your personal information and you are free to decide your participation. We hope that you would take out some time to fill this form honestly

شكراً لك لقبولك للمشاركة في هذا الاستبيان ! نحن نود أن نبحث عن استخدام المكملات الغذائية لدى الطلاب. علماً بأن هذا الاستبيان لا يسألك عن معلوماتك الشخصية ولك حرية الاختيار في المشاركة . نأمل منك ملئ هذه الاستمارة بمصداقية.

شكراً لك !

! Thank you!

| SECTION I: Demographic information                                                         |                                                                                                                                                                                                                                                    | القسم الأول : معلومات اجتماعية                                                                                                                                                                                                                                                  |                                                                                                      |
|--------------------------------------------------------------------------------------------|----------------------------------------------------------------------------------------------------------------------------------------------------------------------------------------------------------------------------------------------------|---------------------------------------------------------------------------------------------------------------------------------------------------------------------------------------------------------------------------------------------------------------------------------|------------------------------------------------------------------------------------------------------|
| Your age                                                                                   | <input type="radio"/> _____ years                                                                                                                                                                                                                  | <input type="radio"/> ..... عام                                                                                                                                                                                                                                                 | 1. العمر:                                                                                            |
| College of study                                                                           | <input type="radio"/> _____                                                                                                                                                                                                                        | <input type="radio"/> كلية .....                                                                                                                                                                                                                                                | 2. الكلية :                                                                                          |
| Gender                                                                                     | <input type="radio"/> Male<br><input type="radio"/> Female                                                                                                                                                                                         | <input type="radio"/> ذكر<br><input type="radio"/> أنثى                                                                                                                                                                                                                         | 3. الجنس:                                                                                            |
| Marital status                                                                             | <input type="radio"/> Single<br><input type="radio"/> Married<br><input type="radio"/> Other                                                                                                                                                       | <input type="radio"/> عازب/ة<br><input type="radio"/> متزوج/ة<br><input type="radio"/> غير ذلك                                                                                                                                                                                  | 4. الحالة الاجتماعية:                                                                                |
| Number of children                                                                         | <input type="radio"/> 1 – 2 children<br><input type="radio"/> 3 or more children<br><input type="radio"/> Married without children<br><input type="radio"/> Not applicable to me (for single)*                                                     | <input type="radio"/> متزوج/ة بدون أطفال<br><input type="radio"/> ٢-١ طفل<br><input type="radio"/> ٣ أو أكثر<br><input type="radio"/> لا ينطبق علي ( عازب/ة)                                                                                                                    | 5. عدد الأطفال:                                                                                      |
| Year of Study                                                                              | <input type="radio"/> Preparatory Year<br><input type="radio"/> 2nd Year<br><input type="radio"/> 3rd Year<br><input type="radio"/> 4th Year<br><input type="radio"/> 5th Year<br><input type="radio"/> 6th Year<br><input type="radio"/> 7th Year | <input type="radio"/> السنة التحضيرية<br><input type="radio"/> السنة الثانية<br><input type="radio"/> السنة الثالثة<br><input type="radio"/> السنة الرابعة<br><input type="radio"/> السنة الخامسة<br><input type="radio"/> السنة السادسة<br><input type="radio"/> السنة السابعة | 6. السنة الدراسية:                                                                                   |
| Number of siblings                                                                         | <input type="radio"/> Between 1 – 2 siblings<br><input type="radio"/> Between 3 – 5 siblings<br><input type="radio"/> Between 6 – 8 siblings<br><input type="radio"/> More than 8 siblings<br><input type="radio"/> No siblings                    | <input type="radio"/> بين ٢-١<br><input type="radio"/> بين ٣-٥<br><input type="radio"/> بين ٦-٨<br><input type="radio"/> أكثر من ٨<br><input type="radio"/> لا أملك                                                                                                             | 7. عدد الأشقاء:                                                                                      |
| Resident status                                                                            | <input type="radio"/> Living with family<br><input type="radio"/> Living alone (University accommodation)                                                                                                                                          | <input type="radio"/> أسكن مع العائلة<br><input type="radio"/> مستقل                                                                                                                                                                                                            | 8. الحالة السكنية:                                                                                   |
| Do you suffer from any illness?                                                            | <input type="radio"/> Yes, I suffer from _____<br><input type="radio"/> No, I do not suffer from any illness                                                                                                                                       | <input type="radio"/> نعم، أعاني من .....<br><input type="radio"/> لا أعاني من أي مرض                                                                                                                                                                                           | 9. هل تعاني من أي مرض؟                                                                               |
| القسم الثاني: مدى شيوع استخدام المكملات الغذائية                                           |                                                                                                                                                                                                                                                    |                                                                                                                                                                                                                                                                                 |                                                                                                      |
| Please indicate if you use any dietary supplements in the last month?                      | <input type="radio"/> Daily.<br><input type="radio"/> Weekly.<br><input type="radio"/> Once a month.<br><input type="radio"/> Never.<br><input type="radio"/> I am not sure if I used dietary supplements in the last month.                       | <input type="radio"/> بصورة يومية<br><input type="radio"/> بصورة أسبوعية<br><input type="radio"/> بصورة شهرية<br><input type="radio"/> لم أستخدم ابدا<br><input type="radio"/> لست متأكد اذا استخدمتها في الشهر السابق                                                          | 10. كم مرة استخدمت فيها أحد أنواع المكملات الغذائية خلال الشهر السابق؟                               |
| القسم الثالث: تكاليف المكملات الغذائية                                                     |                                                                                                                                                                                                                                                    |                                                                                                                                                                                                                                                                                 |                                                                                                      |
| How much your dietary supplement cost you in the last month? (Not applicable if not used)* | _____ SAR                                                                                                                                                                                                                                          | قد كلفتنى ..... ريال<br>كم كلفتك المكملات الغذائية في الشهر السابق؟<br>* (لا ينطبق إذا لا تستخدم المكملات الغذائية) *                                                                                                                                                           | 11. كم كلفتك المكملات الغذائية في الشهر السابق ( لا ينطق اذا كنت ممن لا يستخدمون المكملات الغذائية ) |

|                                                                                                          |                                                                                                                                                                                                                                                                                                                                                                                                                                                    |                                                                                                                                                                                                                                                                                                                                                                                     |                                                                                  |
|----------------------------------------------------------------------------------------------------------|----------------------------------------------------------------------------------------------------------------------------------------------------------------------------------------------------------------------------------------------------------------------------------------------------------------------------------------------------------------------------------------------------------------------------------------------------|-------------------------------------------------------------------------------------------------------------------------------------------------------------------------------------------------------------------------------------------------------------------------------------------------------------------------------------------------------------------------------------|----------------------------------------------------------------------------------|
| Which dietary supplement you used last month?                                                            | <ul style="list-style-type: none"> <li>○ Generic</li> <li>○ Brand</li> <li>○ Both</li> <li>○ I don't know</li> <li>○ Not applicable to me as I did not use</li> </ul>                                                                                                                                                                                                                                                                              | <ul style="list-style-type: none"> <li>○ مكملات محلية الصنع</li> <li>○ مكملات عالمية الصنع</li> <li>○ الاثنين</li> <li>○ لا اعلم</li> <li>○ لا ينطبق علي لانني لست ممن يستخدم المكملات الغذائية</li> </ul>                                                                                                                                                                          | 12. ما نوع المكملات الغذائية التي استخدمتها خلال الشهر الماضي؟                   |
| القسم الرابع: الآثار الضارة للمكملات الغذائية                                                            |                                                                                                                                                                                                                                                                                                                                                                                                                                                    |                                                                                                                                                                                                                                                                                                                                                                                     |                                                                                  |
| In the last month did you experience any side effects that were related to your dietary supplements use? | <ul style="list-style-type: none"> <li>○ Yes, I suffered from</li> <li>○ I suffered from adverse event but not sure if it was related to dietary supplement use</li> <li>○ No, I did not suffer from any adverse effect</li> <li>○ Not applicable to me as I did not use any dietary supplement</li> </ul>                                                                                                                                         | <ul style="list-style-type: none"> <li>○ نعم، عانيت من .....</li> <li>○ لقد عانيت من عرض جانبي ولكن لست متأكدا ما إذا كان يتعلق باستخدامي إلى المكملات الغذائية</li> <li>○ لا، لم اعاني من اي عرض جانبي</li> <li>○ لا ينطبق علي لانني لست ممن يستخدم المكملات الغذائية</li> </ul>                                                                                                   | 13. في الشهر الماضي هل عانيت من أي عرض جانبي يتعلق بالمكملات الغذائية الخاصة بك؟ |
| القسم الخامس: اسباب استخدام المكملات الغذائية                                                            |                                                                                                                                                                                                                                                                                                                                                                                                                                                    |                                                                                                                                                                                                                                                                                                                                                                                     |                                                                                  |
| Reason for taking dietary supplements?                                                                   | <p>(You may select more than one)*</p> <ul style="list-style-type: none"> <li>○ General health and well being</li> <li>○ Boost immunity</li> <li>○ Weight gain</li> <li>○ Doctor's recommendation</li> <li>○ Enhance memory</li> <li>○ Increase performance/sports</li> <li>○ Increase endurance/ body building</li> <li>○ Joint care</li> <li>○ I have a poor diet</li> <li>○ Energy source</li> <li>○ Other reason _____</li> <li>○ -</li> </ul> | <p>( بإمكانك اختيار أكثر من اختيار )</p> <ul style="list-style-type: none"> <li>○ الصحة العامة</li> <li>○ تعزيز المناعة</li> <li>○ زيادة الوزن</li> <li>○ تعليمات الطبيب</li> <li>○ تعزيز الذاكرة</li> <li>○ رفع الأداء الرياضي</li> <li>○ بناء الأجسام</li> <li>○ العناية بالمفاصل</li> <li>○ نظامي الغذائي غير كافي</li> <li>○ مصدر طاقة</li> <li>○ اخرى (ذكرها) .....</li> </ul> | 14. ما هو سبب استعمالك إلى المكملات الغذائية؟                                    |
| Which of the following dietary supplement you used in particular?                                        | <p>2. (You may select more than one)*</p> <ul style="list-style-type: none"> <li>○ I did not use</li> <li>○ Multivitamins</li> <li>○ Ginseng</li> <li>○ Gingko biloba</li> <li>○ Glucosamine / omega 3 fatty acids</li> <li>○ Whey protein</li> <li>○ Evening Primrose oil</li> <li>○ Other _____</li> </ul>                                                                                                                                       | <p>( بإمكانك اختيار أكثر من واحد )</p> <ul style="list-style-type: none"> <li>○ انا لا استخدم</li> <li>○ فيتامينات</li> <li>○ الجنسغ</li> <li>○ الجنكة ( جنكو بيلوبا )</li> <li>○ Glucosamine / Omega 3</li> <li>○ Whey protein</li> <li>○ Evening Primrose oil</li> <li>○ اخرى (ذكرها) .....</li> </ul>                                                                            | 15. اي مما يلي من المكملات الغذائية تستخدمه بالتحديد؟                            |
| القسم السادس: آراء واعتقادات حول المكملات الغذائية                                                       |                                                                                                                                                                                                                                                                                                                                                                                                                                                    |                                                                                                                                                                                                                                                                                                                                                                                     |                                                                                  |
| Is dietary supplement good for health?                                                                   | <ul style="list-style-type: none"> <li>○ Agree</li> <li>○ I don't know</li> <li>○ Disagree</li> </ul>                                                                                                                                                                                                                                                                                                                                              | <ul style="list-style-type: none"> <li>○ أتفق</li> <li>○ لا أعلم</li> <li>○ لا أتفق</li> </ul>                                                                                                                                                                                                                                                                                      | 16. هل تتفق أن المكملات الغذائية مفيدة للصحة؟                                    |
| Do you encourage the use of dietary supplements?                                                         | <ul style="list-style-type: none"> <li>○ Yes, I always recommend</li> <li>○ Yes, only when doctors recommend</li> <li>○ Not at all</li> </ul>                                                                                                                                                                                                                                                                                                      | <ul style="list-style-type: none"> <li>○ نعم، أنا أستحسنها</li> <li>○ نعم، بشرط أن يستحسنها الطبيب</li> <li>○ لا أبدا</li> </ul>                                                                                                                                                                                                                                                    | 17. هل تشجع على استخدام المكملات الغذائية؟                                       |

|                                                                            |                                                                                                                                                                                                                                   |                                                                                                                                                                                                                           |                                                                         |
|----------------------------------------------------------------------------|-----------------------------------------------------------------------------------------------------------------------------------------------------------------------------------------------------------------------------------|---------------------------------------------------------------------------------------------------------------------------------------------------------------------------------------------------------------------------|-------------------------------------------------------------------------|
| Your opinion about dietary supplements                                     | <ul style="list-style-type: none"> <li>○ Necessary for all ages</li> <li>○ They are harmless</li> <li>○ Regular use of Dietary supplements prevents chronic diseases</li> <li>○ Dietary supplements may prevent cancer</li> </ul> | <ul style="list-style-type: none"> <li>○ ضرورية لكل الأعمار</li> <li>○ غير مضر بالصحة</li> <li>○ الاستخدام المنتظم للمكملات الغذائية يقي من الأمراض المزمنة</li> <li>○ المكملات الغذائية قد تقي من مرض السرطان</li> </ul> | 18. ما هو اعتقادك حول المكملات الغذائية؟                                |
| How do you rate your experience with dietary supplement use?               | WORST ← 0 - 1 - 2 - 3 - 4 - 5 → BEST                                                                                                                                                                                              | ممتازة → 0 - 1 - 2 - 3 - 4 - 5 ← سيئة                                                                                                                                                                                     | 19. ما هو تقييمك الى تجربتك مع المكملات الغذائية؟                       |
| What is your major source of information regarding dietary supplement use? | <ul style="list-style-type: none"> <li>○ Friends, family, relatives</li> <li>○ Doctors and pharmacists</li> <li>○ Internet</li> <li>○ Newspaper and magazines</li> <li>○ Other</li> </ul>                                         | <ul style="list-style-type: none"> <li>○ الأصدقاء ، العائلة ، الأقارب</li> <li>○ الأطباء والصيدالة</li> <li>○ الإنترنت</li> <li>○ الجرائد والمجلات</li> <li>○ أخرى</li> </ul>                                             | 20. ما هو المصدر الرئيسي للمعلومات المتعلقة باستخدام المكملات الغذائية؟ |

شكرا لك

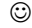

Supplement: 12906_2018_2332_MOESM1_ESM.pdf [file 12906_2018_2332_MOESM1_ESM.pdf]
